# Supplementary material
Source: PubMed Central journal article supplement (PMC4004779)
Supplement: me-12-1387.pdf [file me-12-1387.pdf]

**Supplementary Figure 1. NFIB and STAT5 co-regulate mammary gland specific genes.** Mean expression levels of three gene sets (co-regulated, STAT5-specific and NFIB-specific genes) in various tissues were measured by RNA-seq. Some of RNA-seq data sets were obtained from a previous study (GSE29278). MEF – mouse embryonic fibroblasts and ESC – embryonic stem cells.
